# Supplementary material for: The Triple Helix after communism: Russia and China compared
Source: Springer Nature journal article supplement (doi:10.1186/s40604-015-0031-4), 2016-01-21
Supplement: MOESM1 [file 11901884]

## The triple helix after communism: Russia and China compared

المراوح الثلاثة بعد الشيوعية: مقارنة بين روسيا والصين

الكاتب (ة) : Jon Askonas و Harley Balzer

### ملخص

حاولت روسيا والصين تغيير النمط السوفيتي لنظام البحث والتطوير الذي كان يعتمد على التعليم وعلى مجالات البحث و الاعمال بشئ اخر اكثر تكيفا مع اقتصاد المعرفة لدعم الابتكار. يعتبر نموذج المراوح الثلاثة تجسيدا جذابا لأنجح ممارسات نظم الابتكار التي تفترض التكامل بين ثلاثة جهات رئيسية فاعلة اى الجامعة ، المؤسسة والدولة. يفرض هذا النمط الذى يضع الدولة فى محور الاهتمام على الانظمة والدول الغير ديمقراطية الالتحاق بدول منظمة التعاون الاقتصادي والتنمية. سنقارن الجهود الصينية والروسية التى بذلت لتنفيذ برنامج المراوح الثلاثة عبر دراسة التغيرات التى شملت المؤسسات ، المجتمعات المعرفية ، التمويل ودور الدولة بالاعتماد على دراسة حالة للتكنولوجيات الدقيقة بالرغم من ان هاتين الدولتين وضعتا برامج ضخمة ورصدتا تمويلات هامة إلا اننا وجدنا ان الجهود الصينية اثمرت اكثر من نظيرتها الروسية فى دفع التعاون بين الجامعة والمؤسسة والدولة لتطوير البحث والابتكار. نرجع هذا الاختلاف الى نجاعة السياسات الاقتصادية التى تضمنت على تشجيعات للأفراد ولمجتمعات المعرفة لتغيير سلوكياتهم. وقد ساعدت الظروف التى تزامنت مع انطلاق الإصلاحات على تحقيق هذه النتائج وجعل الصينى اكثر قابلية للتعلم.
